# Supplementary material for: SANS study on the nano-crystalline network structure of elastic physical gels made of syndiotactic polypropylene
Source: Royal Society of Chemistry journal article supplement (doi:10.1039/c9sm00582j), 2019-01-01
Supplement: c9sm00582j1.pdf [file c9sm00582j1.pdf]

**Supporting Information**

**SANS study on the nano-crystalline network structure of elastic physical  
gels made of syndiotactic polypropylene**

Fuyuaki Endo <sup>a</sup>, Naruki Kurokawa <sup>a</sup>, Keishi Tanimoto <sup>a</sup>, Hiroki Iwase <sup>b</sup>, Tomoki Maeda <sup>a</sup>,  
and Atsushi Hotta <sup>\*a</sup>

<sup>a</sup> Department of Mechanical Engineering, Keio University, 3-14-1 Hiyoshi, Kohoku-ku,  
Yokohama 223-8522, Japan.

<sup>b</sup> Research Center for Neutron Science and Technology, Comprehensive Research  
Organization for Science and Society (CROSS), 162-1 Shirakata, Tokai, Ibaraki 319-1106,  
Japan.

\*Corresponding author. Tel.: +81-45-566-1604, fax: +81-45-566-1495.

E-mail address: hotta@mech.keio.ac.jp (Atsushi Hotta)

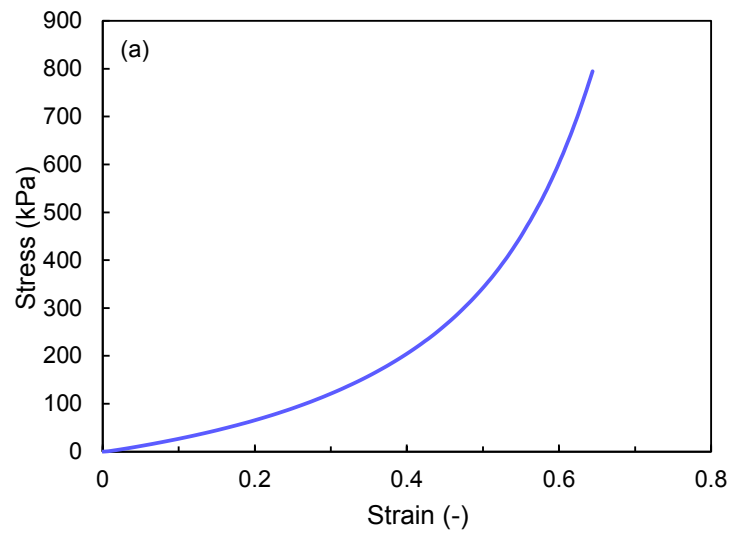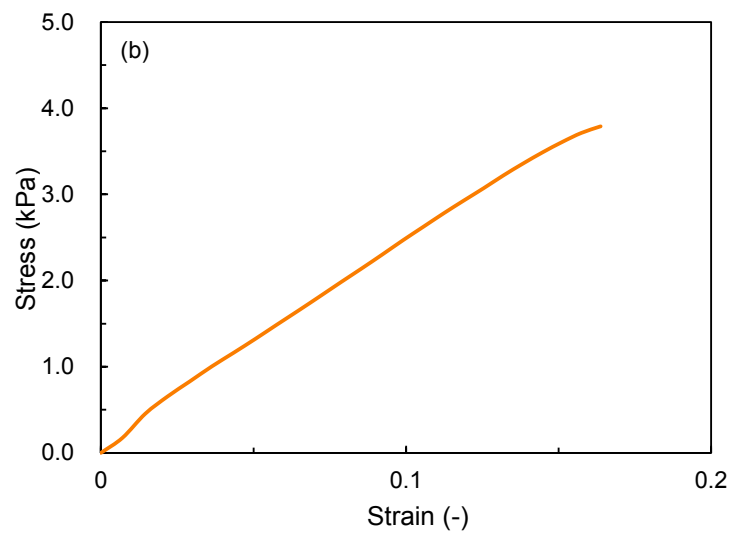

**Fig. S1** Stress-strain curves of sPP gels: (a) Gel LN and (b) Gel 25.

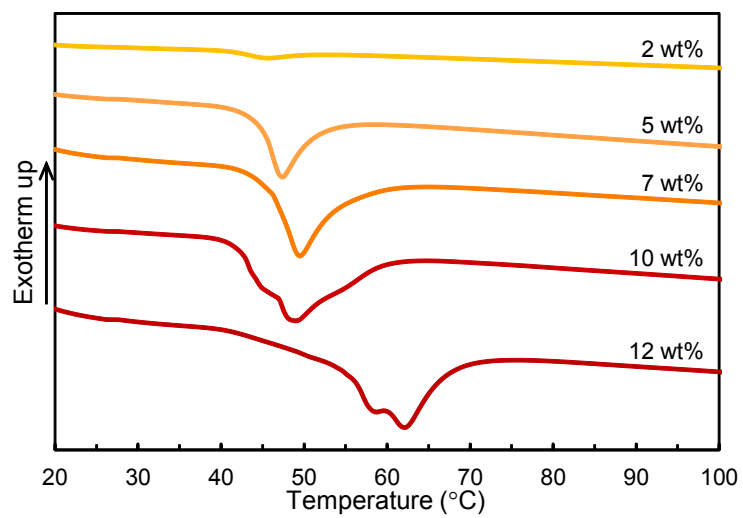

**Fig. S2** DSC curves of Gel 25 with different sPP concentrations.
